# Supplementary material
Source: publisher figshare collection journal article supplement (https://acs.figshare.com/ndownloader/files/14303135)
Supplement: Supplementary file 1 [file 14303135]

# Zn<sub>3</sub>P<sub>2</sub> Twinning Superlattice Nanowires Grown on Fluorine-Doped Tin Oxide Glass Substrates

*Seon Bin Choi, Man Suk Song, and Yong Kim\**

*Department of Physics, Dong-A University, Hadan-2-dong, Sahagu, Busan 49315, Korea*

Supporting Information

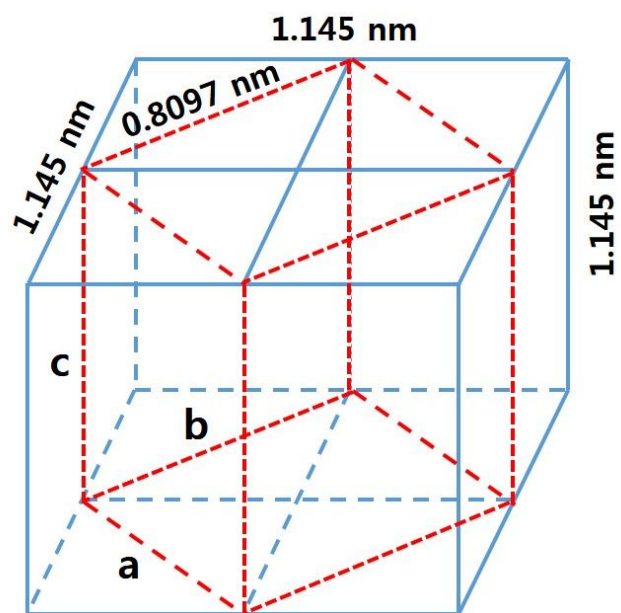

**Figure S1.** Relationship between pseudo cubic and tetragonal unit cells.

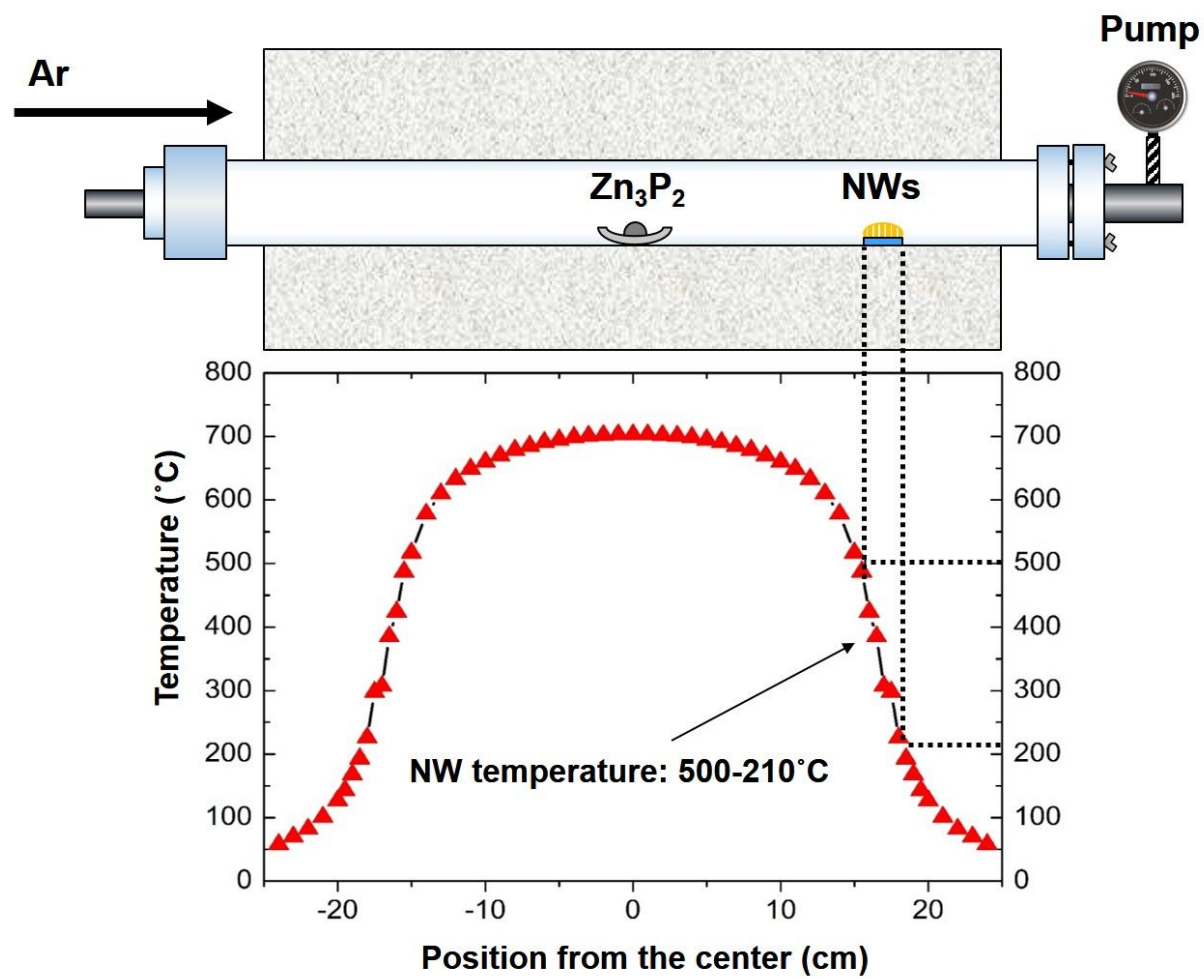

**Figure S2.** Physical vapor transport system and temperature profile.

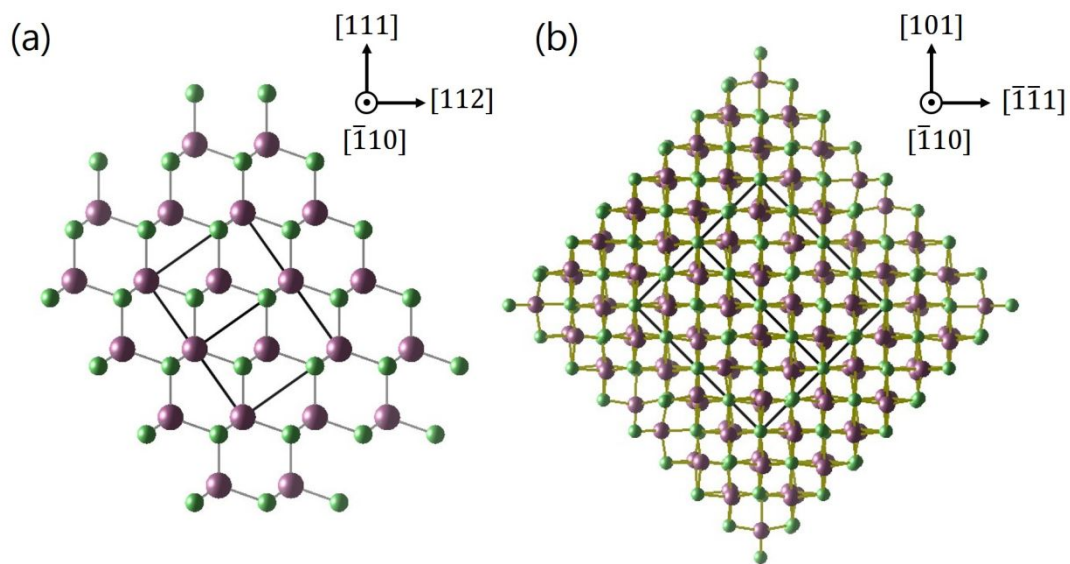

**Figure S3.** Atomic structures of (a) ZB InAs and (b)  $\text{Zn}_3\text{P}_2$  for comparison. Black boxes are unit cells. Red atoms are (a) In and (b) Zn. Green atoms are (a) As and (b) P. Atomic structures are simulated by VESTA 3.<sup>1</sup> Note that tetragonal  $\text{Zn}_3\text{P}_2$  has a 40-atom unit cell in contrast to the 8-atom unit cell for ZB InAs.

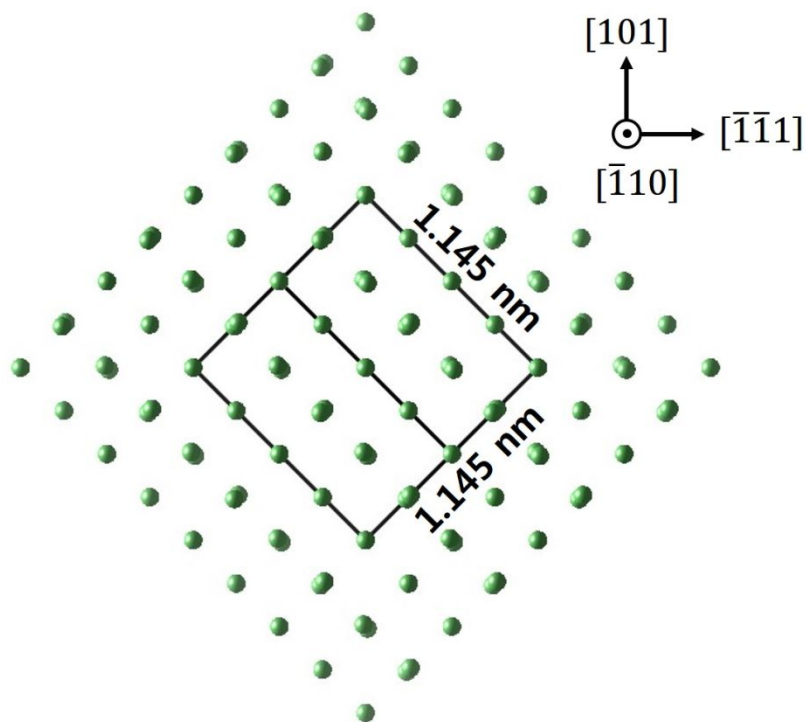

**Figure S4.** Atomic structures of P in  $\text{Zn}_3\text{P}_2$ . Black box is unit cell. Atomic structures are simulated by VESTA 3.<sup>1</sup> 8 atomic planes within a unit cell correspond to monolayer height, ( $h = 1.145\sqrt{2}/8 = 0.202$  nm).

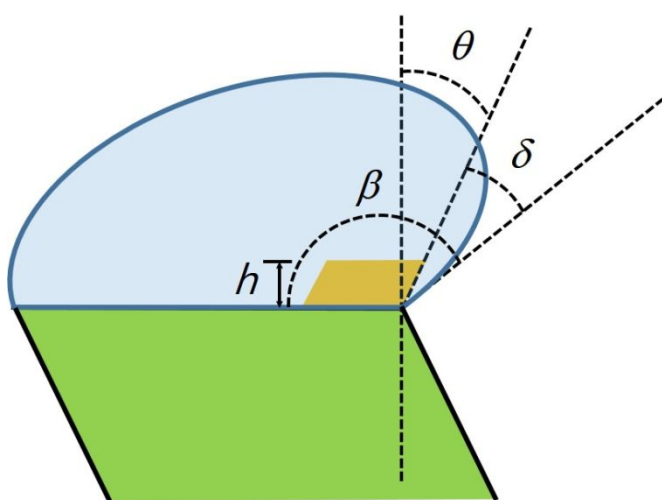

**Figure S5.** Relationship between various angles presented in the text.

## REFERENCES

- (1) Homma, K.; Izumi, F. VESTA 3 for Three-Dimensional Visualization of Crystal, Volumetric and Morphology Data *J. Appl. Crystallogr.* **2011**, *44*, 1272–1276
